# Supplementary material for: High expression of Tie-2 predicts poor prognosis in primary high grade serous ovarian cancer
Source: PubMed Central journal article supplement (PMC7644024; doi:10.1371/journal.pone.0241484), 2020-11-05

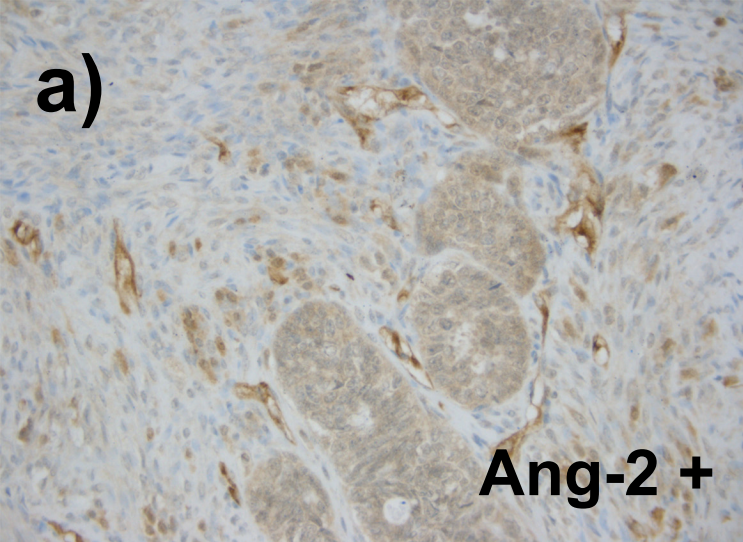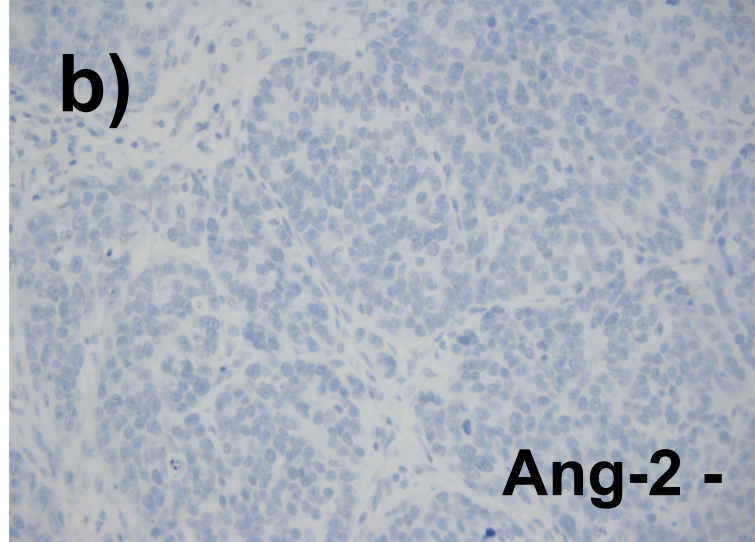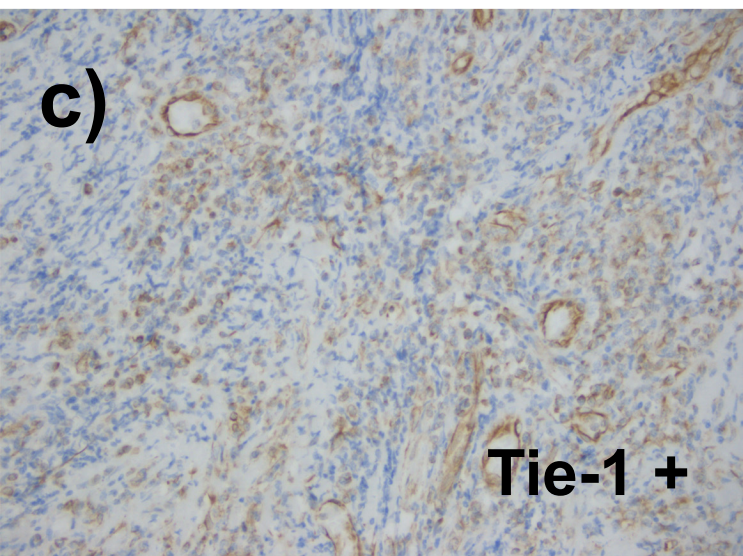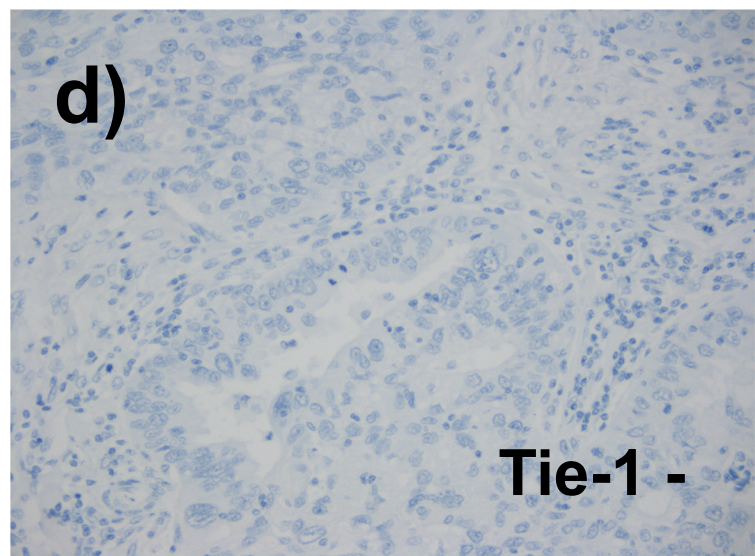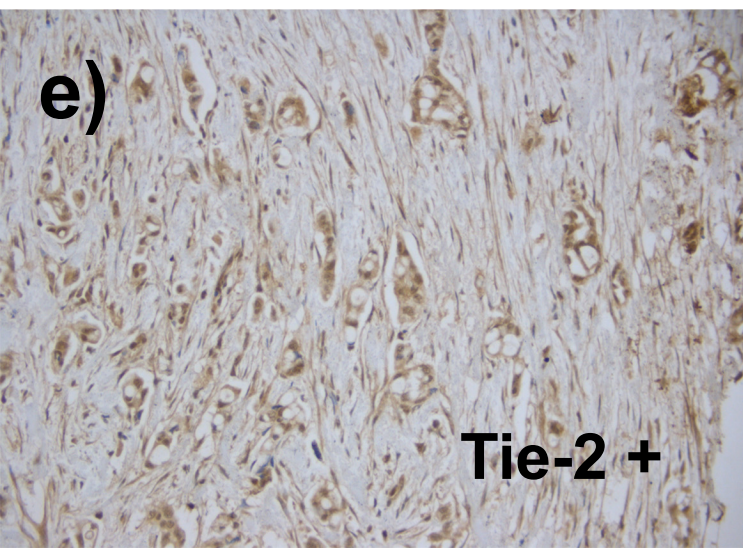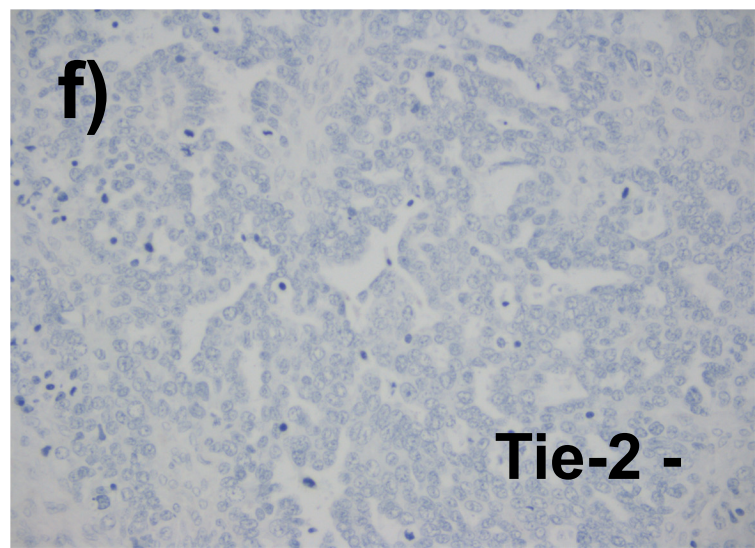

Supplement: pone.0241484.s001.pdf [file pone.0241484.s001.pdf]
